# Supplementary material for: Chemical and Biological Profiling of Fish and Seaweed Residues to Be Applied for Plant Fertilization
Source: MDPI journal article supplement (doi:10.3390/agronomy13092258), 2023-08-28
Supplement: s1 [file s1]

## **Chemical and biological profiling of fish and seaweed residues to be applied for plant fertilization**

Marios Maroulis,<sup>1</sup> Sevasti Matsia,<sup>1</sup> Georgios Lazopoulos,<sup>1</sup> Oana Cristina Pârvulescu,<sup>2</sup> Violeta Alexandra Ion,<sup>3</sup> Oana-Crina Bujor,<sup>3</sup> Joshua Cabell,<sup>4</sup> Anne-Kristin Løes,<sup>4</sup> Athanasios Salifoglou\*,<sup>1</sup>

<sup>1</sup> Laboratory of Inorganic Chemistry and Advanced Materials, School of Chemical Engineering, Aristotle University of Thessaloniki, Thessaloniki 54124, Greece.

<sup>2</sup> Chemical and Biochemical Engineering Department, University Politehnica of Bucharest, 1-7 Gheorghe Polizu Str., 011061 Bucharest, Romania.

<sup>3</sup> Research Center for Studies of Food and Agricultural Products Quality, University of Agronomic Sciences and Veterinary Medicine of Bucharest, 59 Marasti Blvd., 011464 Bucharest, Romania.

<sup>4</sup> Norwegian Centre for Organic Agriculture, Gunnars veg 6, NO-6630 Tingvoll, Norway

\* Author to whom correspondence should be addressed.

Tel: +30-2310-996-179, E-mail: salif@auth.gr

**Table S1:** Extract concentrations expressed at ng<sub>extract</sub>/g dry material/mL DMSO

|               |                                                                |
|---------------|----------------------------------------------------------------|
| HNSW-E-EA 1%  | 28.0 ng <sub>extract</sub> /g dry HNSW/mL DMSO                 |
| HNSW-E-EA 5%  | 14.0×10 <sup>1</sup> ng <sub>extract</sub> /g dry HNSW/mL DMSO |
| HNSW-E-EA 10% | 28.0×10 <sup>1</sup> ng <sub>extract</sub> /g dry HNSW/mL DMSO |
| HNSW-E-EA 30% | 84.0×10 <sup>1</sup> ng <sub>extract</sub> /g dry HNSW/mL DMSO |
| HNSW-E-EA 50% | 14.0×10 <sup>2</sup> ng <sub>extract</sub> /g dry HNSW/mL DMSO |
| HNSW-E-EA 80% | 22.4×10 <sup>2</sup> ng <sub>extract</sub> /g dry HNSW/mL DMSO |
| LNSW-E-EA 1%  | 24.6 ng <sub>extract</sub> /g dry LNSW/mL DMSO                 |
| LNSW-E-EA 5%  | 12.3×10 <sup>1</sup> ng <sub>extract</sub> /g dry LNSW/mL DMSO |
| LNSW-E-EA 10% | 24.6×10 <sup>1</sup> ng <sub>extract</sub> /g dry LNSW/mL DMSO |
| LNSW-E-EA 30% | 73.8×10 <sup>1</sup> ng <sub>extract</sub> /g dry LNSW/mL DMSO |
| LNSW-E-EA 50% | 12.3×10 <sup>2</sup> ng <sub>extract</sub> /g dry LNSW/mL DMSO |
| LNSW-E-EA 80% | 19.7×10 <sup>2</sup> ng <sub>extract</sub> /g dry LNSW/mL DMSO |
| GFB-E-EA 1%   | 64.8 ng <sub>extract</sub> /g dry GFB/mL DMSO                  |
| GFB-E-EA 5%   | 32.4×10 <sup>1</sup> ng <sub>extract</sub> /g dry GFB/mL DMSO  |
| GFB-E-EA 10%  | 64.8×10 <sup>1</sup> ng <sub>extract</sub> /g dry GFB/mL DMSO  |
| GFB-E-EA 30%  | 19.4×10 <sup>2</sup> ng <sub>extract</sub> /g dry GFB/mL DMSO  |
| GFB-E-EA 50%  | 32.4×10 <sup>2</sup> ng <sub>extract</sub> /g dry GFB/mL DMSO  |
| GFB-E-EA 80%  | 51.8×10 <sup>2</sup> ng <sub>extract</sub> /g dry GFB/mL DMSO  |

## Figure captions

- Fig. S1:**    **A.** FT-IR Comparative spectra of **HNSW**, **LNSW**, and **GFB** samples  
                  **B.** FT-IR spectrum of **HNSW**  
                  **C.** FT-IR spectrum of **LNSW**  
                  **D.** FT-IR spectrum of **GFB**
- Fig. S2:**    In vitro cell viability in the presence of **HNSW-E-EA** for 24, 48, and 72 h in **A.** N2a58, and **B.** SH-SY5Y cell cultures in a concentration-dependent fashion.
- Fig. S3:**    In vitro cell viability in the presence of **LNSW-E-EA** for 24, 48, and 72 h in **A.** N2a58, and **B.** SH-SY5Y cell cultures in a concentration-dependent fashion.
- Fig. S4:**    Morphological studies of **HNSW-E-EA**, **LNSW-E-EA**, and **GFB-E-EA** in SH-SY5Y cultures for 0, 24, 48, and 72 h at the highest concentration of extracts investigated (**HNSW-E-EA**,  $28.0 \times 10^2$  ng<sub>extract</sub>/g dry HNSW/mL DMSO; **LNSW-E-EA**,  $24.6 \times 10^2$  ng<sub>extract</sub>/g dry LNSW/mL DMSO, and **GFB-E-EA**,  $64.8 \times 10^2$  ng<sub>extract</sub>/g dry GFB/mL DMSO).

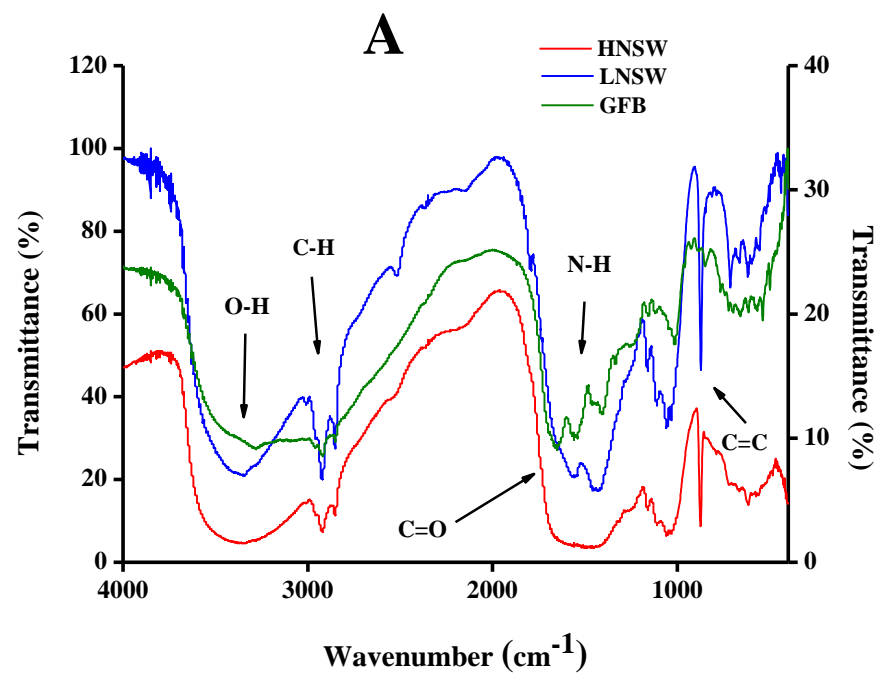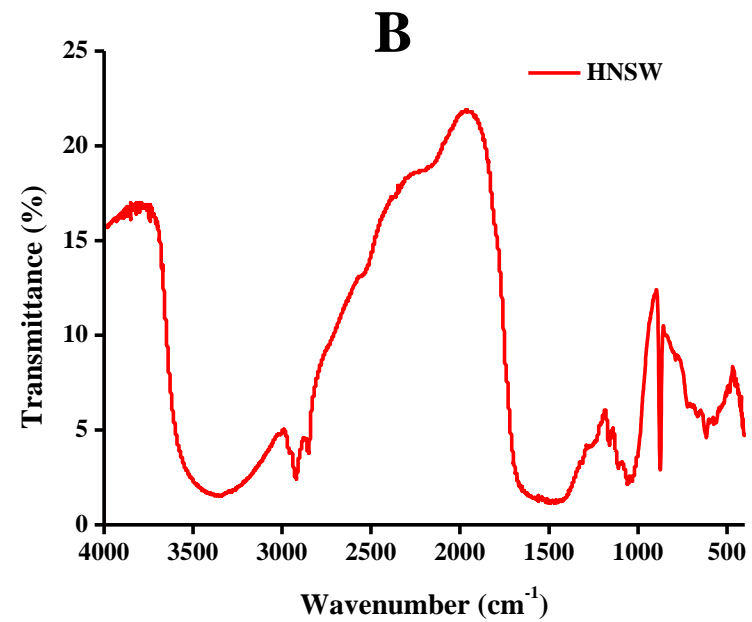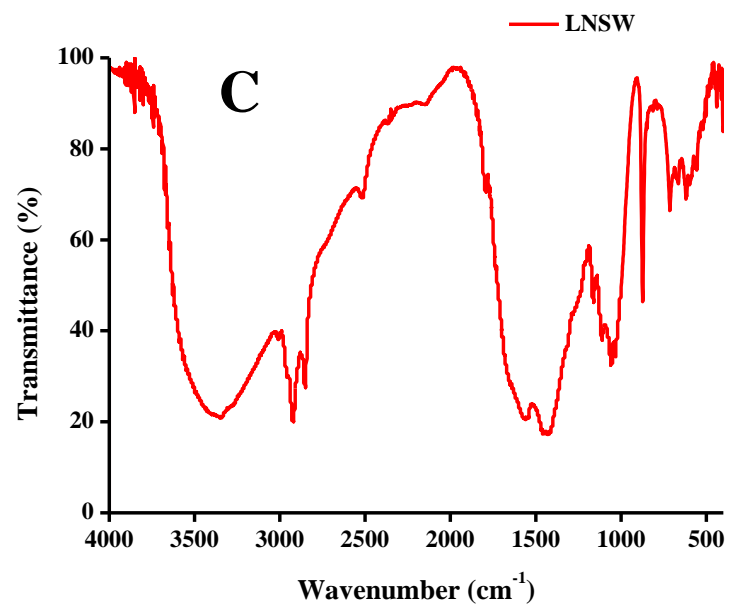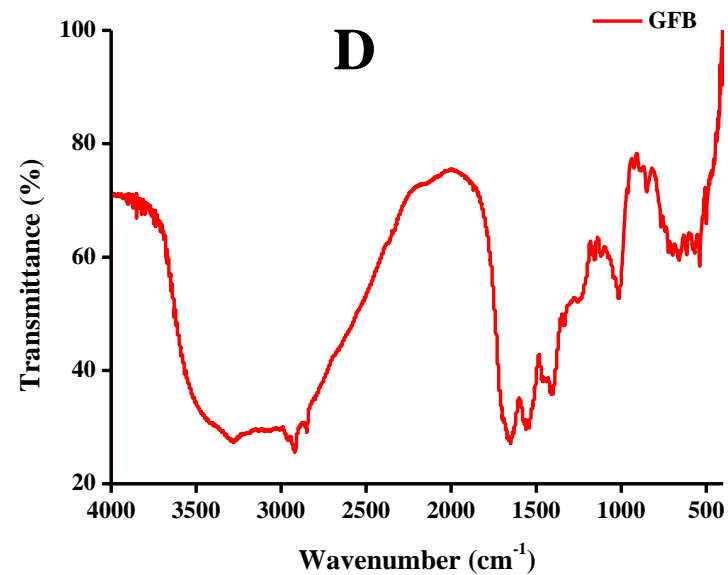**Figure S1**

A

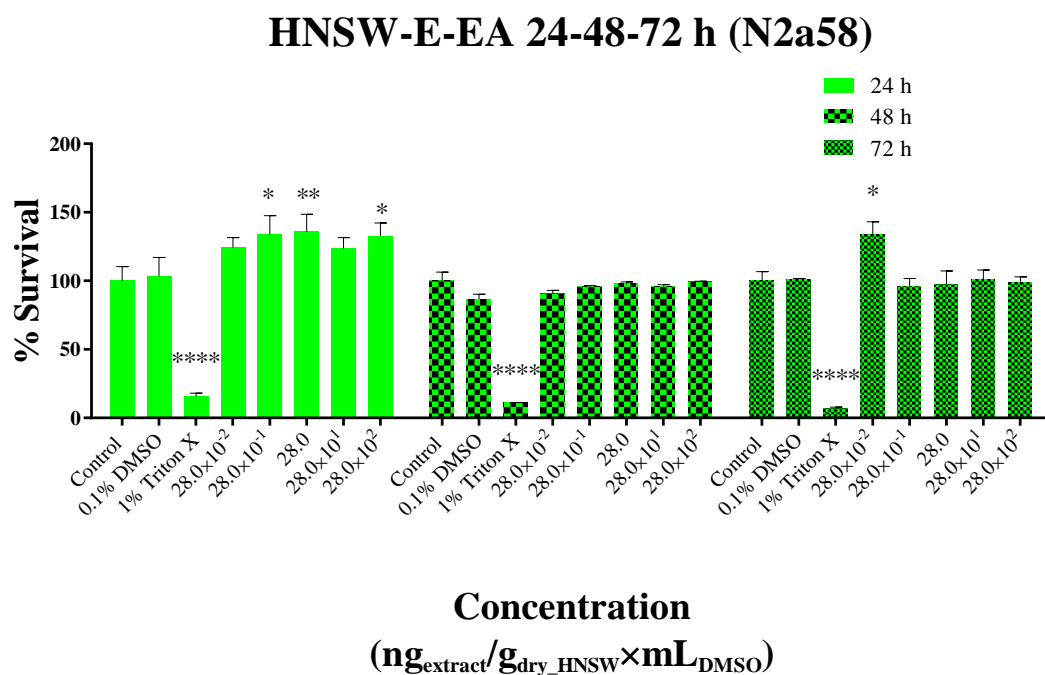

B

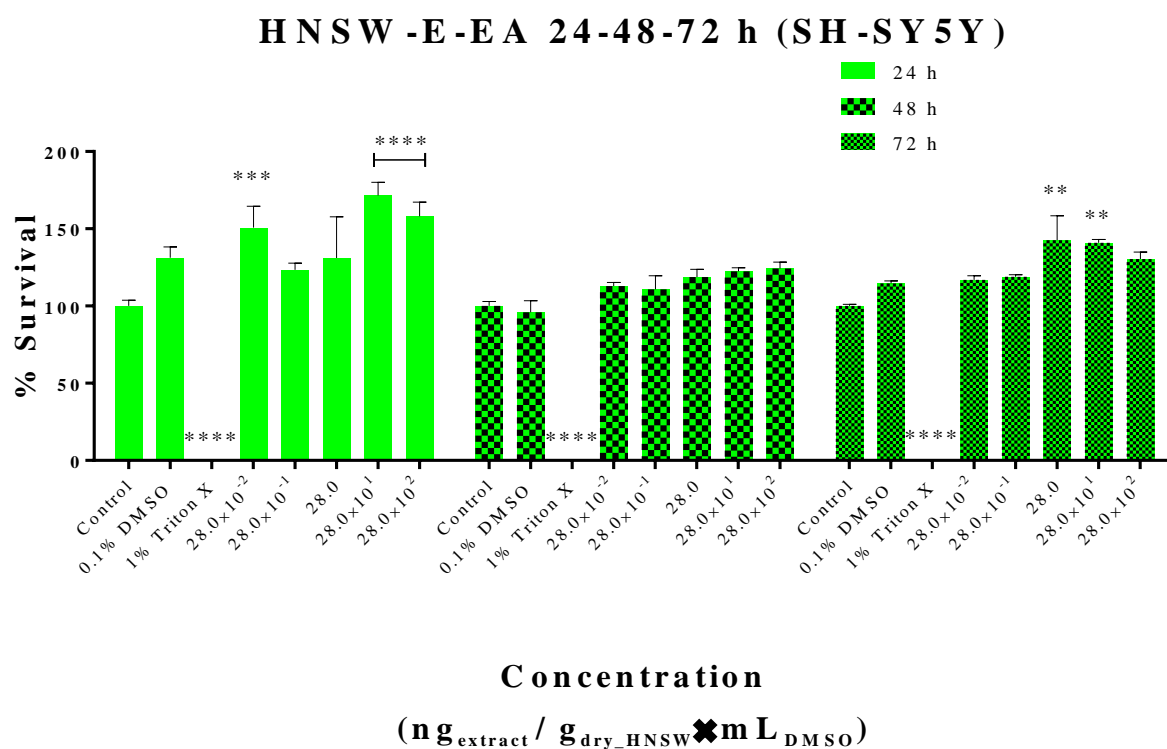

Figure S2

# LNSW-E-EA 24-48-72 h (N2a58)

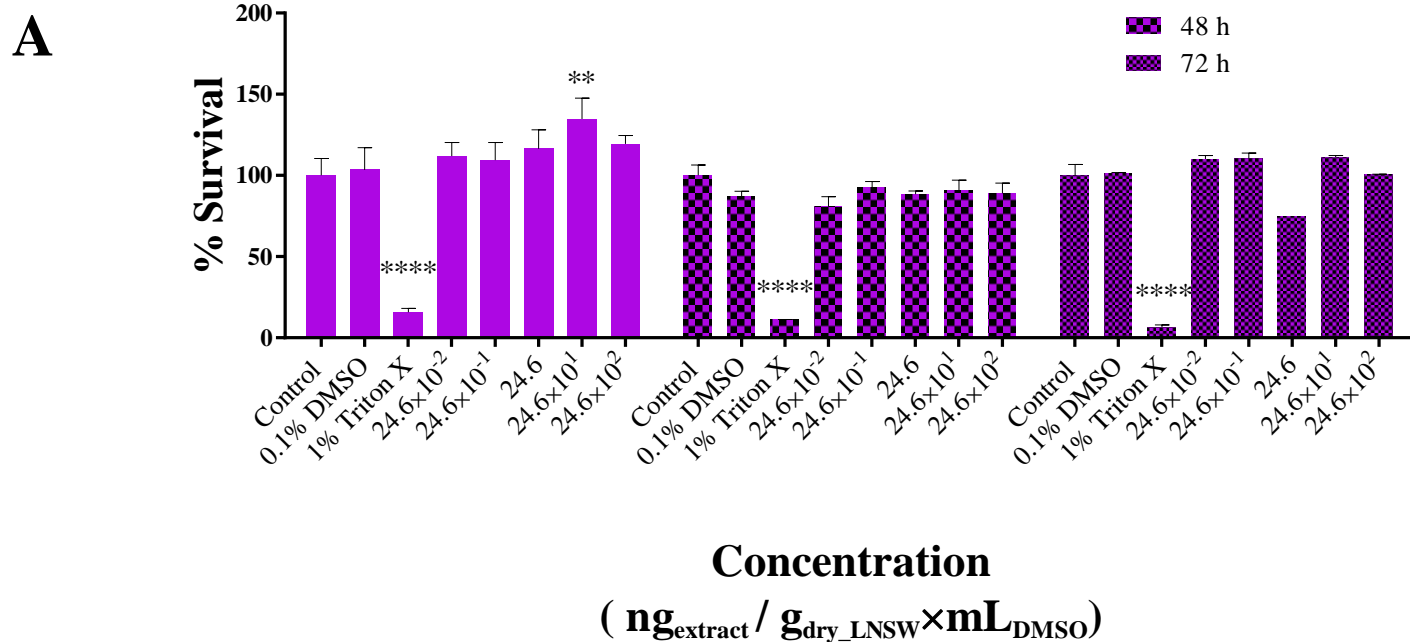

# LNSW-E-EA 24-48-72 h (SH-SY5Y)

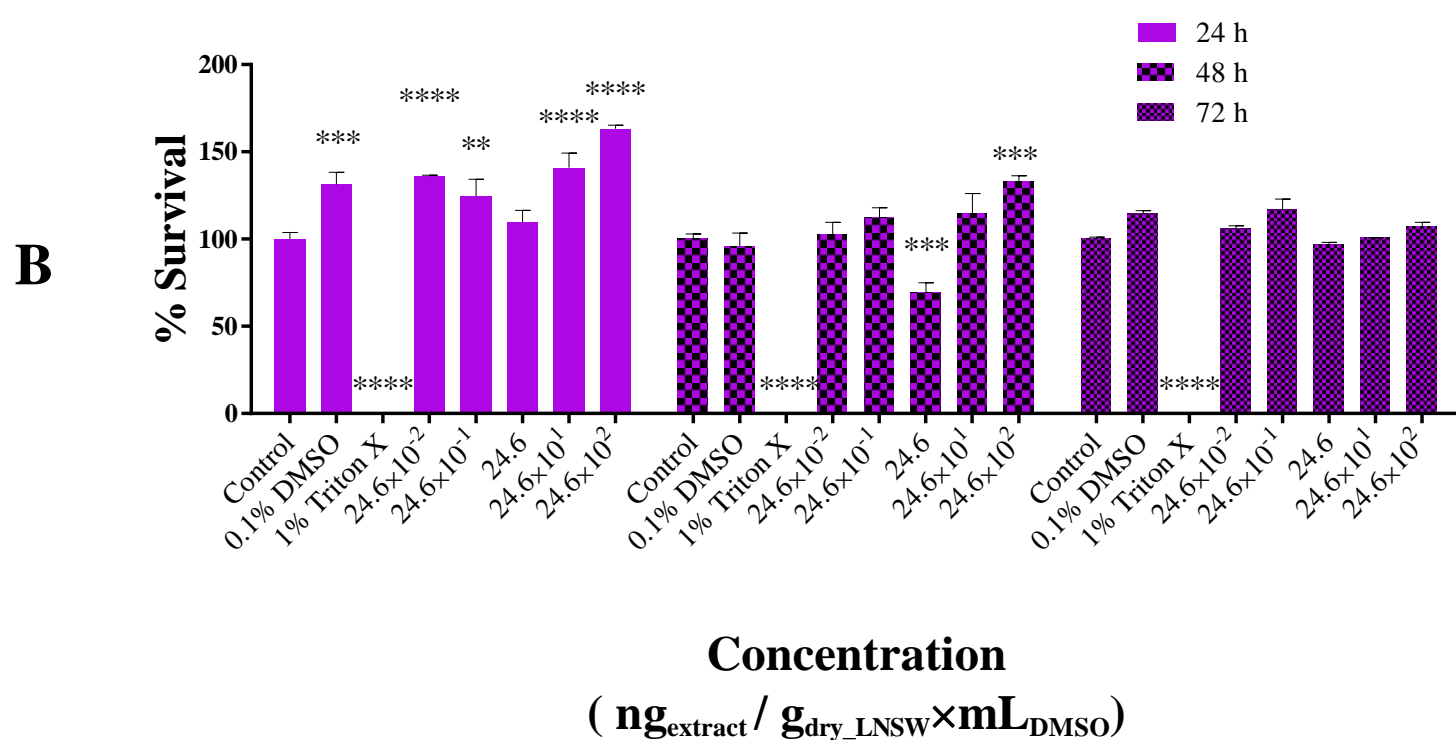

**Figure S3**

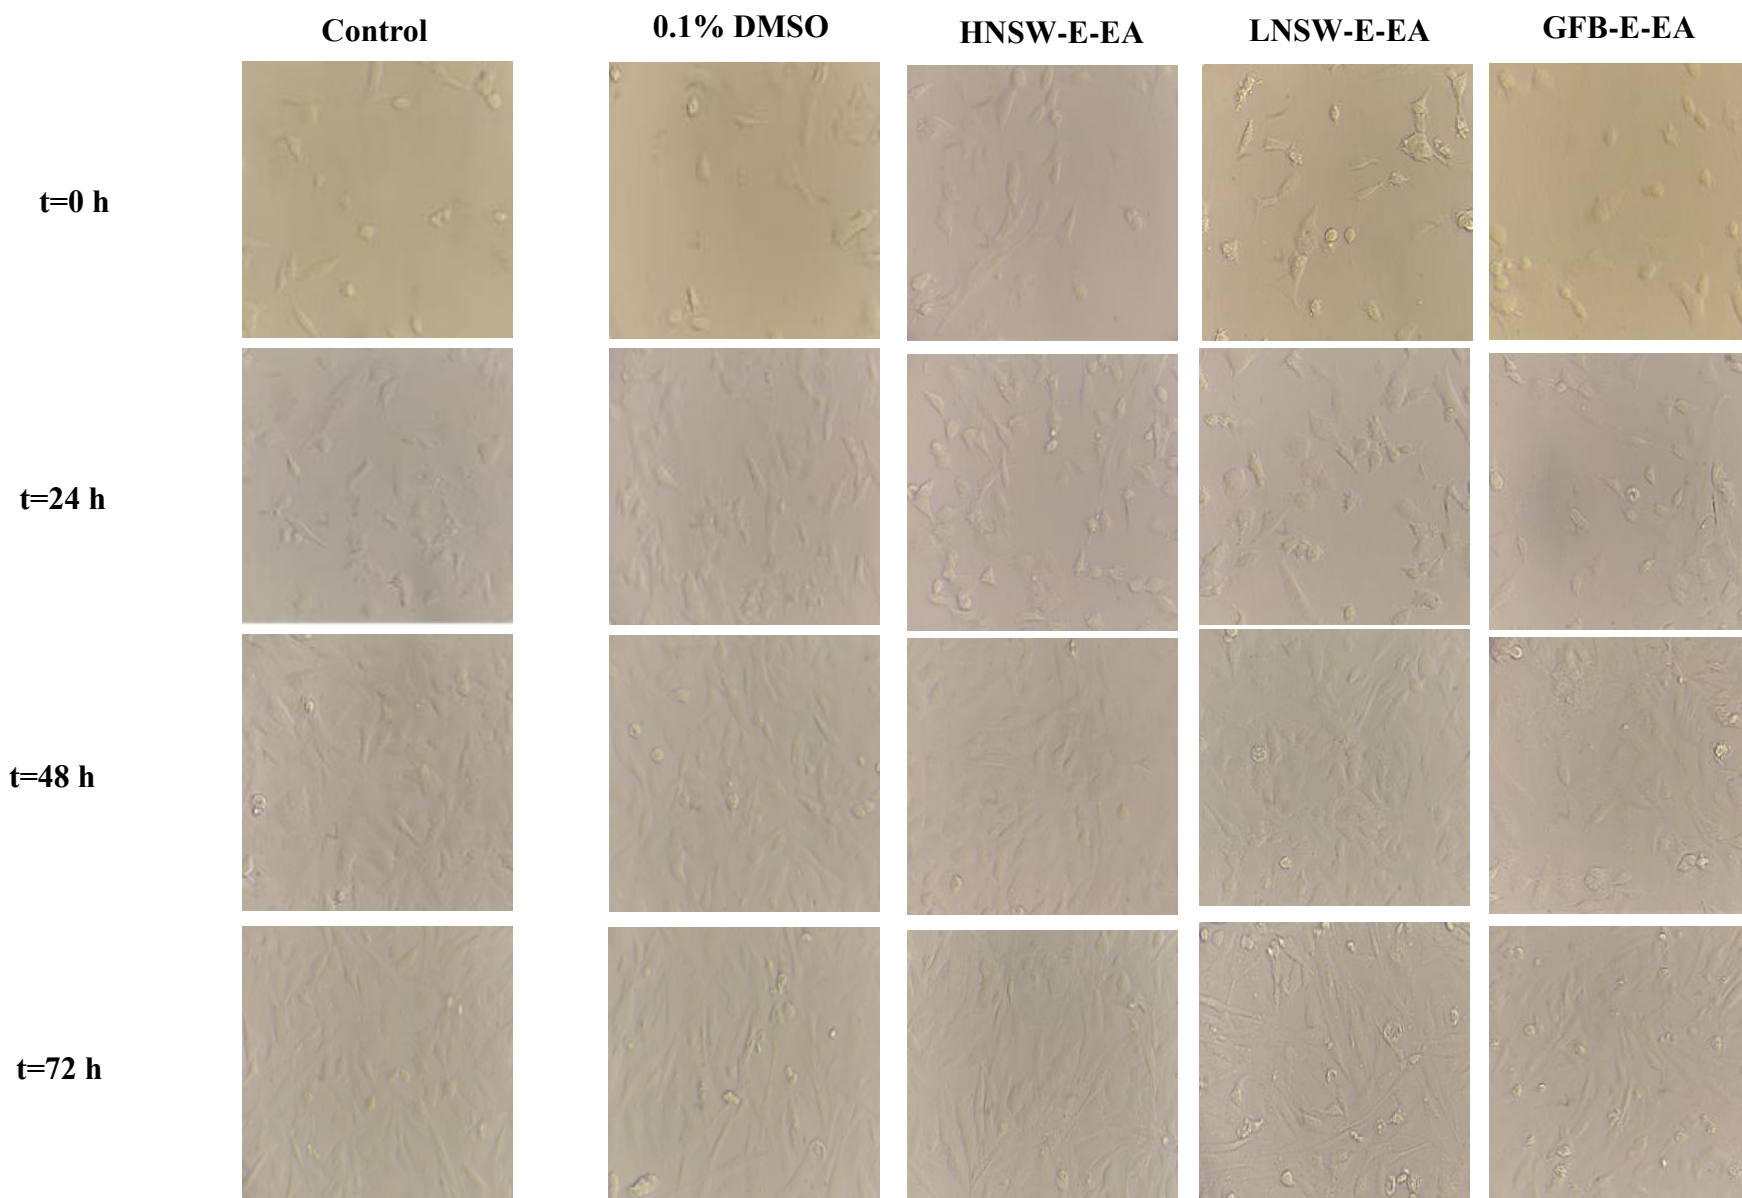

**Figure S4**
